# Supplementary material for: Learnings From a Pilot Study to Strengthen Primary Health Care Services: The Community-Clinic-Centered Health Service Model in Barishal District, Bangladesh
Source: PubMed Central journal article supplement (PMC7971368; doi:10.9745/ghsp-d-20-00466), 2021-03-15
Supplement: 20-00466-Uddin-Supplement3.pdf [file 20-00466-Uddin-Supplement3.pdf]

**Supplement to:** Uddin ME, George J, Jahan S, Shams Z, Haque N, Perry HB. Learnings from a pilot study to strengthen primary health care services: the community-clinic-centered health service model in Barishal District, Bangladesh. *Glob Health Sci Pract.* 2021;9(Suppl 1). <https://doi.org/10.9745/GHSP-D-20-00466>

### Supplement 3.

Difference in difference analysis on selected key health indicators in between pre-pilot phase and pilot phase (by comparing means for each indicator in the Intervention and Comparison Areas using 2 sample t-test (Supplement 3. Table 1)

**Supplement 3. Table 1. Numbers of specific types of services provided in the Community Clinics in the Intervention Area during the Pre-Pilot Phase (October 2017-September 2018) and the Pilot Phase (October 2018-September 2019)**

| Services                                       | Pre-pilot phase | Pilot phase | Difference | Mean, standard deviation | P value* |
|------------------------------------------------|-----------------|-------------|------------|--------------------------|----------|
| <b>Number of women receiving care</b>          |                 |             |            |                          | 0.06     |
| Intervention Area                              |                 |             |            |                          |          |
| Mahilara                                       | 1719            | 2002        | 283        |                          |          |
| Rangasree                                      | 2727            | 2851        | 124        |                          |          |
| Soliabagpur                                    | 1469            | 2059        | 590        |                          |          |
| Bamrail                                        | 1398            | 1758        | 360        |                          |          |
| Raypasha                                       | 1491            | 1537        | 46         |                          |          |
| Rahmatpur                                      | 1390            | 1598        | 208        |                          |          |
| Mean and standard deviation of the differences |                 |             |            | 268.5, 192.87            |          |
| Control Area                                   |                 |             |            |                          |          |
| Gaila                                          | 809             | 965         | 156        |                          |          |
| Rajihar                                        | 1528            | 1293        | -235       |                          |          |
| Charkalehan                                    | 953             | 1716        | 763        |                          |          |
| Kazichor                                       | 1031            | 1101        | 70         |                          |          |
| Laukathi                                       | 2514            | 2508        | -6         |                          |          |
| Borobighai                                     | 1398            | 1332        | -66        |                          |          |
| Mean and standard deviation of the differences |                 |             |            | 113.67,344.53            |          |
| <b>Antenatal care</b>                          |                 |             |            |                          | 0.004    |
| Intervention Area                              |                 |             |            |                          |          |
| Mahilara                                       | 314             | 422         | 108        |                          |          |
| Rangasree                                      | 871             | 916         | 45         |                          |          |
| Soliabagpur                                    | 364             | 826         | 462        |                          |          |
| Bamrail                                        | 591             | 945         | 354        |                          |          |
| Raypasha                                       | 386             | 435         | 49         |                          |          |

**Supplement to:** Uddin ME, George J, Jahan S, Shams Z, Haque N, Perry HB. Learnings from a pilot study to strengthen primary health care services: the community-clinic-centered health service model in Barishal District, Bangladesh. *Glob Health Sci Pract.* 2021;9(Suppl 1). <https://doi.org/10.9745/GHSP-D-20-00466>

| Services                                       | Pre-pilot phase | Pilot phase | Difference | Mean, standard deviation | P value* |
|------------------------------------------------|-----------------|-------------|------------|--------------------------|----------|
| Rahmatpur                                      | 391             | 568         | 177        |                          |          |
| Mean and standard deviation of the differences |                 |             |            | 199.0,171.2              |          |
| Control Area                                   |                 |             |            |                          |          |
| Gaila                                          | 238             | 280         | 42         |                          |          |
| Rajihar                                        | 470             | 399         | -71        |                          |          |
| Charkalehan                                    | 295             | 517         | 222        |                          |          |
| Kazichor                                       | 236             | 410         | 174        |                          |          |
| Laukathi                                       | 495             | 493         | -2         |                          |          |
| Borobighai                                     | 286             | 221         | -65        |                          |          |
| Mean and standard deviation of the differences |                 |             |            | 50.0, 123.0              |          |
| <b>Postnatal care</b>                          |                 |             |            |                          | 0.23     |
| Intervention Area                              |                 |             |            |                          |          |
| Mahilara                                       | 167             | 182         | 15         |                          |          |
| Rangasree                                      | 238             | 258         | 20         |                          |          |
| Soliabagpur                                    | 95              | 131         | 36         |                          |          |
| Bamrail                                        | 172             | 195         | 23         |                          |          |
| Raypasha                                       | 118             | 135         | 17         |                          |          |
| Rahmatpur                                      | 65              | 120         | 55         |                          |          |
| Mean and standard deviation of the differences |                 |             |            | 27.7, 15.3               |          |
| Control Area                                   |                 |             |            |                          |          |
| Gaila                                          | 85              | 84          | -1         |                          |          |
| Rajihar                                        | 107             | 86          | -21        |                          |          |
| Charkalehan                                    | 124             | 227         | 103        |                          |          |
| Kazichor                                       | 69              | 105         | 36         |                          |          |
| Laukathi                                       | 266             | 241         | -25        |                          |          |
| Borobighai                                     | 141             | 115         | -26        |                          |          |
| Mean and standard deviation of the differences |                 |             |            | 11.0, 50.8               |          |
| <b>Nutritional counselling</b>                 |                 |             |            |                          | 0.01     |
| Intervention Area                              |                 |             |            |                          |          |
| Mahilara                                       | 321             | 344         | 23         |                          |          |
| Rangasree                                      | 670             | 682         | 12         |                          |          |
| Soliabagpur                                    | 361             | 821         | 460        |                          |          |
| Bamrail                                        | 584             | 940         | 356        |                          |          |
| Raypasha                                       | 373             | 438         | 65         |                          |          |
| Rahmatpur                                      | 378             | 542         | 164        |                          |          |

**Supplement to:** Uddin ME, George J, Jahan S, Shams Z, Haque N, Perry HB. Learnings from a pilot study to strengthen primary health care services: the community-clinic-centered health service model in Barishal District, Bangladesh. *Glob Health Sci Pract.* 2021;9(Suppl 1). <https://doi.org/10.9745/GHSP-D-20-00466>

| Services                                                                 | Pre-pilot phase | Pilot phase | Difference | Mean, standard deviation | P value* |
|--------------------------------------------------------------------------|-----------------|-------------|------------|--------------------------|----------|
| Mean and standard deviation of the differences                           |                 |             |            | 180.0, 187.47            |          |
| Control Area                                                             |                 |             |            |                          |          |
| Gaila                                                                    | 232             | 242         | 10         |                          |          |
| Rajihar                                                                  | 459             | 395         | -64        |                          |          |
| Charkalehan                                                              | 245             | 489         | 244        |                          |          |
| Kazichor                                                                 | 222             | 313         | 91         |                          |          |
| Laukathi                                                                 | 465             | 459         | -6         |                          |          |
| Borobighai                                                               | 184             | 198         | 14         |                          |          |
| Mean and standard deviation of the differences                           |                 |             |            | 44.2, 108.0              |          |
| <b>Iron/folic acid tablet distribution</b>                               |                 |             |            |                          | 0.01     |
| Intervention Area                                                        |                 |             |            |                          |          |
| Mahilara                                                                 | 475             | 509         | 34         |                          |          |
| Rangasree                                                                | 847             | 830         | -17        |                          |          |
| Soliabagpur                                                              | 450             | 945         | 495        |                          |          |
| Bamrail                                                                  | 742             | 1124        | 382        |                          |          |
| Raypasha                                                                 | 473             | 591         | 118        |                          |          |
| Rahmatpur                                                                | 435             | 680         | 245        |                          |          |
| Mean and standard deviation of the differences                           |                 |             |            | 209.5, 201.5             |          |
| Control Area                                                             |                 |             |            |                          |          |
| Gaila                                                                    | 317             | 344         | 27         |                          |          |
| Rajihar                                                                  | 563             | 483         | -80        |                          |          |
| Charkalehan                                                              | 359             | 643         | 284        |                          |          |
| Kazichor                                                                 | 284             | 411         | 127        |                          |          |
| Laukathi                                                                 | 628             | 685         | 57         |                          |          |
| Borobighai                                                               | 361             | 356         | -5         |                          |          |
| Mean and standard deviation of the differences                           |                 |             |            | 68.3, 125.8              |          |
| <b>Number of children younger than 5 years of age receiving services</b> |                 |             |            |                          | 0.39     |
| Intervention                                                             |                 |             |            |                          |          |
| Mahilara                                                                 | 2782            | 3300        | 518        |                          |          |
| Rangasree                                                                | 3438            | 3874        | 436        |                          |          |
| Soliabagpur                                                              | 4762            | 4276        | -486       |                          |          |
| Bamrail                                                                  | 2918            | 4176        | 1258       |                          |          |
| Raypasha                                                                 | 2670            | 2976        | 306        |                          |          |

**Supplement to:** Uddin ME, George J, Jahan S, Shams Z, Haque N, Perry HB. Learnings from a pilot study to strengthen primary health care services: the community-clinic-centered health service model in Barishal District, Bangladesh. *Glob Health Sci Pract.* 2021;9(Suppl 1). <https://doi.org/10.9745/GHSP-D-20-00466>

| Services                                         | Pre-pilot phase | Pilot phase | Difference | Mean, standard deviation | P value* |
|--------------------------------------------------|-----------------|-------------|------------|--------------------------|----------|
| Rahmatpur                                        | 2200            | 2230        | 30         |                          |          |
| Mean and standard deviation of the differences   |                 |             |            | 343.7, 576.7             |          |
| Control                                          |                 |             |            |                          |          |
| Gaila                                            | 2288            | 2540        | 252        |                          |          |
| Rajihar                                          | 2830            | 2364        | -466       |                          |          |
| Charkalehan                                      | 3322            | 3904        | 582        |                          |          |
| Kazichor                                         | 2922            | 4136        | 1214       |                          |          |
| Laukathi                                         | 2822            | 2530        | -292       |                          |          |
| Borobighai                                       | 920             | 1194        | 274        |                          |          |
| Mean and standard deviation of the differences   |                 |             |            | 258, 679.4               |          |
| <b>Number of referrals of women and children</b> |                 |             |            |                          | 0.07     |
| Intervention                                     | 53              | 203         | 150        |                          |          |
| Mahilara                                         | 79              | 89          | 10         |                          |          |
| Rangasree                                        | 46              | 59          | 13         |                          |          |
| Soliabagpur                                      | 166             | 174         | 8          |                          |          |
| Bamrail                                          | 17              | 28          | 11         |                          |          |
| Raypasha                                         | 2               | 6           | 4          |                          |          |
| Rahmatpur                                        |                 |             |            |                          |          |
| Mean and standard deviation of the differences   |                 |             |            | 32.67, 57.56             |          |
| Control                                          |                 |             |            |                          |          |
| Gaila                                            | 111             | 98          | -13        |                          |          |
| Rajihar                                          | 51              | 40          | -11        |                          |          |
| Charkalehan                                      | 248             | 241         | -7         |                          |          |
| Kazichor                                         | 124             | 98          | -26        |                          |          |
| Laukathi                                         | 145             | 132         | -13        |                          |          |
| Borobighai                                       | 61              | 72          | 11         |                          |          |
| Mean and standard deviation of the differences   |                 |             |            | -9.83, 4.92              |          |

\*The p values assess the probability that the changes in utilization between the pre-pilot phase and the pilot phase in the Intervention Area were greater than in the Control Area. The t test was used for this calculation, with equal variances assumed
